# Supplementary material
Source: MDPI journal article supplement (https://www.mdpi.com/2071-1050/16/10/4198)
Supplement: s1 [file s1]

## Measure 1.1 AGRONOMIC AND IN-FIELD ADAPTATION

**Risk: Modifications of phenology and physiology**

**Impacts:**

*Select reference impacts considering the highlighted risk*

- ☐ Impact 1
- ☐ Impact 2
- ☐ Impact 3
- ☐ Impact 4

**Exposed factors:**

*Select reference exposition factors considering the selected adaptation measure*

- ☐ Exposed factor 1
- ☐ Exposed factor 2
- ☐ Exposed factor 3
- ☐ Exposed factor 4
- ☐ Exposed factor 5

**Vulnerabilities:**

*Select reference vulnerabilities considering select adaptation measure*

- ☐ Vulnerability 1
- ☐ Vulnerability 2
- ☐ Vulnerability 3
- ☐ Vulnerability 4
- ☐ Vulnerability 5
- ☐ Vulnerability 6

### **ADAPTATION ACTIONS:**

*The mentioned action(s) are referring to every measure.*

*We are asking to suggest potential further actions to be integrated considering the various time scales (short, medium, and long) and typology.*

Short-terms actions (2025):

- Action 1:  
*Typology:*
- Action 2:  
*Typology:*

Medium-term actions (2030):

- Action 1:  
*Typology:*
- Action 2:  
*Typology:*

Long-term actions (2050):

- Action 1:  
*Typology:*

- Action 2:  
*Typology:*

*Possible typologies for the different actions*

- PHYSICAL AND TECHNOLOGY
- INSTITUTIONAL GOVERNANCE
- ECONOMICS AND FINANCE
- KNOWLEDGE AND BEHAVIOUR CHANGE
- NATURE-BASED SOLUTIONS

## Description

*In this section briefly describe the structure and the contents of the proposed adaptation measure.*

1. *Current framework referring to risk and evaluation of its forecasted development through time*
2. *Describe the different proposed actions focusing on:*
  - a. *implementation process and steps*
  - b. *involved stakeholders (public administration, farmers, industry, banks,...)*

## References:

- *Indicate potential projects, research actions, ongoing measures that can support or foster the implementation of the measure*
- *Indicate existing commercial or industrial solutions (products, softwares, tools,...) supporting the implementation of the measure*
- *Indicate existing norms, rules, regulations connected to the implementation process*

### Priority analysis

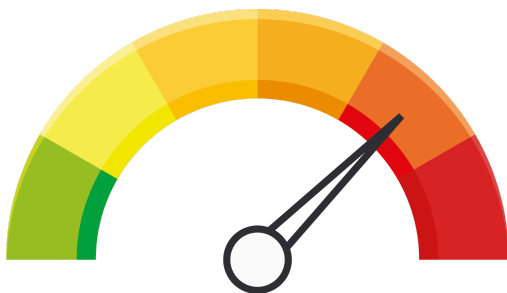

### Applicability and feasibility analysis

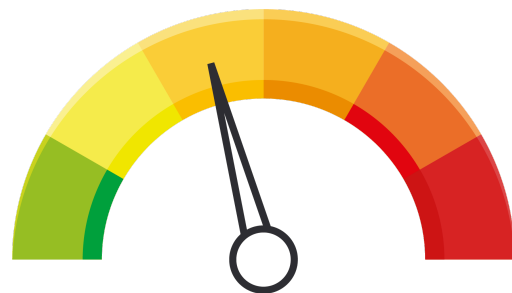

- *Priority analysis: 1 - green = Low priority / 6 - red = Max priority*
- *Applicability and feasibility analysis: 1-green = High feasibility / 6 - red = Low feasibility / existing obstacles to implementation*

## Hindering factors

*Select the categories of hindering and barriers to implementation*

- ☐ **Juridical** (eg: norms, inadequate or absent regulations)
- ☐ **Organizational** (eg: missing coordination among institutions, missing representativity of stakeholders)

- ☐ **Technological** (eg: costs/missing tools)
- ☐ **Social** (eg: acceptance of measure, negative marketing)
- ☐ **Environmental** (eg: lack of available land or soil, inadequate environmental quality)

### **Missing factors for implementation**

*Indicate missing datasets, knowledge, informations (eg: high resolution maps, statistical data, open access information,...) that are lacking for effective implementation of the measure and actions*

### **Qualitative costs/benefits analysis and potential co-benefits:**

- *Identify related actions (ongoing or included in other proposed adaptation measures)*
- *Identify potential benefits for stakeholders deriving from the implementation of the measure (eventually linked to other actions)*
- *Estimate implementation costs (if possible)*

### **Expected reduction of vulnerability (stima):**

*Briefly explain which exposed factors or vulnerabilities are expected to be reduced by implementing described actions.*

*If applicable, estimate the value of such reduction with quantitative (number, %, surface,...) or qualitative (total, partial, minimal, ...) indicators.*

*If applicable, define timing (short, medium, or long term).*

### **Monitoring indicator:**

- *Identify possible quali-quantitative indicators to monitor effectiveness of the actions (eg: reduced incidence of an impact, number of farmers involved, ...)*
- *Describe availability of datasets or indicators and their characteristics (existing, publicly available, non available, non existent,...) and their precision.*
- *Identify which stakeholder has the data*
